# Supplementary material
Source: publisher figshare collection journal article supplement (https://acs.figshare.com/ndownloader/files/24755523)
Supplement: Supplementary file 1 [file 24755523]

Compound_ID	SMILES	HLF1	HPASMC	Rat aortic ring	Emax(1?M, %)
1	CC1=NN(C2=CC=CC=C2)C3=C1C=C(C4=NC(N)=CC(N)=N4)C(O)=N3	>100	40.6
2	CC1=NN(C2=CC=CC=C2)C3=C1C=C(C4=NC(N)=CC(N)=N4)C(OCC5=C(C)C=CC=C5)=N3	38.5	17	0.29	63.2
21a	CC1=NN(C2=CC=CC=C2)C3=C1C=C(C4=NC(N)=CC(N)=N4)C(OCC5=C(F)C=CC=C5)=N3	55.6	59.3	2.2	41.3
21b	CC1=NN(C2=CC=CC=C2)C3=C1C=C(C4=NC(N)=C(N5CCOCC5)C(N)=N4)C(OCC6=C(F)C=CC=C6)=N3	>100	25.2	8.2	28.7
21c	CC1=NN(C2=CC=CC=C2)C3=C1C=C(C4=NC(N)=C(N5CCCCC5)C(N)=N4)C(OCC6=C(F)C=CC=C6)=N3	>100	53	0.79	47.8
21d	CC1=NN(C2=CC=CC=C2)C3=C1C=C(C4=NC(N)=C(N5CCCC5)C(N)=N4)C(OCC6=C(F)C=CC=C6)=N3	>100	29.3	12.7	29.8
21e	CC1=NN(C2=CC=CC=C2)C3=C1C=C(C4=NC(N)=C(N(C)C)C(N)=N4)C(OCC5=C(F)C=CC=C5)=N3	>100	56.5	1.1	46.1
24	CC1=NN(C2=CC=CC=C2)C3=C1C=C(C4=NC(N)=C(N)C(N)=N4)C(OCC5=C(F)C=CC=C5)=N3	37.2	22.4	0.96	46.7
25a	CC1=NN(C2=CC=CC=C2)C3=C1C=C(C4=NC(N)=C(NC(C)=O)C(N)=N4)C(OCC5=C(F)C=CC=C5)=N3	>100	34.9	0.93	51.1
25b	CC1=NN(C2=CC=CC=C2)C3=C1C=C(C4=NC(N)=C(NC(OC)=O)C(N)=N4)C(OCC5=C(F)C=CC=C5)=N3	>100	25.5	5.8	31.4
25c	CC1=NN(C2=CC=CC=C2)C3=C1C=C(C4=NC(N)=C(NC(OCCCC)=O)C(N)=N4)C(OCC5=C(F)C=CC=C5)=N3	52.8	21.7	>100	15.8
25d	CC1=NN(C2=CC=CC=C2)C3=C1C=C(C4=NC(N)=C(NC(OC5CCCC5)=O)C(N)=N4)C(OCC6=C(F)C=CC=C6)=N3	63.4	24.8	>100	15.5
27	CC1=NN(C2=CC=CC=C2)C3=C1C=C(C4=NC(N)=C(N5C(OCC5)=O)C(N)=N4)C(OCC6=C(F)C=CC=C6)=N3	49.7	24.7	>100	19.7
29	CC1=NN(C2=CC=CC=C2)C3=C1C=C(C4=NC(NC(N5C)=O)=C5C(N)=N4)C(OCC6=C(F)C=CC=C6)=N3	>100	23.2	4.9	32.9
30	CC1=NN(C2=CC=CC=C2)C(N3CC4=C(F)C=CC=C4)=C1C=C(C5=NC(N)=C(N6CCOCC6)C(N)=N5)C3=O	>100	>100
31a	CC1=NN(C2=CC=CC=C2)C3=C1C=C(C4=NC(N)=CC(N)=N4)C(OCC5=CC(F)=CC=C5)=N3	67.7	68.4	0.36	59.9
31b	CC1=NN(C2=CC=CC=C2)C3=C1C=C(C4=NC(N)=CC(N)=N4)C(OCC5=CC=C(F)C=C5)=N3	55.3	>100
31c	CC1=NN(C2=CC=CC=C2)C3=C1C=C(C4=NC(N)=CC(N)=N4)C(OCC5=CC(C)=CC=C5)=N3	41.9	32	0.99	48.4
31d	CC1=NN(C2=CC=CC=C2)C3=C1C=C(C4=NC(N)=CC(N)=N4)C(OCC5=CC=C(C)C=C5)=N3	>100	89.4
31e	CC1=NN(C2=CC=CC=C2)C3=C1C=C(C4=NC(N)=CC(N)=N4)C(OCC5=CC=CC=C5)=N3	52.8	67.4	10.8	20.4
31f	CC1=NN(C2=CC=CC=C2)C3=C1C=C(C4=NC(N)=CC(N)=N4)C(OCC5=CC=C(C(F)(F)F)C=C5)=N3	31	20.4	1.6	43.4
